# Supplementary material
Source: ML conference proceedings conference paper supplement (https://openreview.net/forum?id=F4TgVGhxJc)
Supplement: supplementary_material [file ICLR_2026_Towards_Human_Preferences_Rewriting_Evaluation__Prompt_Based_Scoring_with_Large_Language_Models_Appendix.pdf › ICLR_2026_Towards_Human_Preferences_Rewriting_Evaluation__Prompt_Based_Scoring_with_Large_Language_Models_Appendix.pdf]

## A LLM USAGE

Large Language Models (LLMs) were used solely to refine the manuscript’s language, including sentence rephrasing, grammar checking, and improving clarity and readability. Their role was limited to polishing the text and enhancing its overall flow.

The LLM was not involved in idea generation, methodology, or analysis. All scientific contributions were made by the authors, who take full responsibility for the content. The use of the LLM was restricted to language improvements and complied with ethical standards, ensuring no plagiarism or scientific misconduct.

## B APPENDIX

Table 7: Score comparison of different models and methods between Expert A and Expert B

| Model                      | Expert A |       |         |         | Expert B |       |         |         |
|----------------------------|----------|-------|---------|---------|----------|-------|---------|---------|
|                            | Spear    | Exact | $\pm 1$ | $\pm 2$ | Spear    | Exact | $\pm 1$ | $\pm 2$ |
| Qwen2.5_3B <sub>N</sub>    | 0.0047   | 15.00 | 44.00   | 75.00   | 0.0948   | 18.50 | 63.00   | 86.50   |
| Qwen2.5_14B <sub>N</sub>   | 0.1431   | 8.00  | 37.00   | 60.00   | 0.1304   | 11.00 | 46.50   | 76.00   |
| Qwen2.5_32B <sub>N</sub>   | 0.0273   | 12.00 | 39.50   | 64.50   | 0.1279   | 13.50 | 54.00   | 79.50   |
| Qwen2.5_3B <sub>O</sub>    | -0.1185  | 14.50 | 43.00   | 68.50   | -0.0792  | 21.00 | 55.00   | 80.50   |
| Qwen2.5_14B <sub>O</sub>   | 0.0813   | 13.50 | 43.00   | 71.50   | 0.1280   | 20.50 | 55.00   | 87.50   |
| Qwen2.5_32B <sub>O</sub>   | 0.3409   | 25.50 | 56.00   | 89.00   | 0.3566   | 34.00 | 75.50   | 97.50   |
| Qwen2.5_3B <sub>OR</sub>   | 0.0075   | 19.00 | 56.00   | 79.50   | 0.0192   | 23.00 | 64.00   | 89.50   |
| Qwen2.5_14B <sub>OR</sub>  | 0.2091   | 22.00 | 56.50   | 84.00   | 0.2082   | 27.50 | 72.00   | 94.00   |
| Qwen2.5_32B <sub>OR</sub>  | 0.3862   | 23.00 | 71.00   | 96.00   | 0.3094   | 35.00 | 83.00   | 98.50   |
| Qwen2.5_3B <sub>MR</sub>   | 0.0873   | 8.00  | 29.00   | 57.50   | 0.1560   | 10.50 | 37.00   | 62.50   |
| Qwen2.5_14B <sub>MR</sub>  | 0.0524   | 21.50 | 48.00   | 80.00   | 0.0870   | 29.00 | 68.00   | 89.00   |
| Qwen2.5_32B <sub>MR</sub>  | 0.2589   | 18.00 | 54.50   | 82.50   | 0.2322   | 27.00 | 68.00   | 93.50   |
| Qwen3_4B <sub>N</sub>      | -0.0460  | 8.63  | 30.82   | 59.18   | -0.0600  | 9.50  | 37.00   | 65.00   |
| Qwen3_14B <sub>N</sub>     | -0.0389  | 8.00  | 28.50   | 50.00   | -0.0088  | 9.50  | 35.50   | 61.50   |
| Qwen3_32B <sub>N</sub>     | -0.1358  | 6.50  | 26.00   | 51.50   | -0.1579  | 10.00 | 35.00   | 58.50   |
| Qwen3_4B <sub>O</sub>      | 0.0853   | 21.51 | 58.08   | 83.42   | 0.1088   | 26.50 | 64.00   | 92.00   |
| Qwen3_14B <sub>O</sub>     | 0.0794   | 17.50 | 49.50   | 77.00   | 0.1975   | 23.00 | 64.00   | 90.00   |
| Qwen3_32B <sub>O</sub>     | 0.2011   | 21.50 | 52.00   | 84.50   | 0.0874   | 23.00 | 65.50   | 91.50   |
| Qwen3_4B <sub>OR</sub>     | 0.0933   | 21.92 | 60.00   | 85.07   | 0.0926   | 28.00 | 68.00   | 94.50   |
| Qwen3_14B <sub>OR</sub>    | 0.1682   | 24.00 | 54.50   | 83.00   | 0.1259   | 27.50 | 70.50   | 92.00   |
| Qwen3_32B <sub>OR</sub>    | 0.1304   | 25.50 | 56.50   | 88.00   | 0.2147   | 32.50 | 72.50   | 95.00   |
| Qwen3_4B <sub>MR</sub>     | 0.1759   | 13.01 | 44.93   | 72.60   | 0.2283   | 13.00 | 51.00   | 81.50   |
| Qwen3_14B <sub>MR</sub>    | 0.0357   | 19.50 | 53.00   | 77.00   | 0.1307   | 26.00 | 68.00   | 93.00   |
| Qwen3_32B <sub>MR</sub>    | 0.1270   | 18.00 | 52.00   | 77.00   | 0.1317   | 25.00 | 63.00   | 91.00   |
| QWQ_32B <sub>N</sub>       | -0.0022  | 9.00  | 29.50   | 51.00   | -0.0475  | 6.50  | 33.50   | 62.00   |
| QWQ_32B <sub>O</sub>       | 0.2072   | 20.50 | 54.00   | 81.50   | 0.1771   | 23.00 | 63.50   | 89.50   |
| QWQ_32B <sub>OR</sub>      | 0.2323   | 28.00 | 65.00   | 90.00   | 0.2139   | 33.50 | 70.50   | 90.50   |
| QWQ_32B <sub>MR</sub>      | 0.7311   | 64.52 | 86.71   | 96.03   | 0.4552   | 30.50 | 72.50   | 91.00   |
| Llama3.1_8B <sub>N</sub>   | -0.0938  | 8.00  | 36.50   | 55.00   | -0.0154  | 7.50  | 42.00   | 71.50   |
| Llama3.1_70B <sub>N</sub>  | 0.0410   | 7.00  | 31.50   | 53.50   | 0.0383   | 5.00  | 37.00   | 71.50   |
| Llama3.1_8B <sub>O</sub>   | -0.2584  | 10.00 | 38.50   | 61.50   | -0.1088  | 20.50 | 52.00   | 77.50   |
| Llama3.1_70B <sub>O</sub>  | 0.1654   | 10.50 | 38.00   | 64.50   | 0.1715   | 14.50 | 45.50   | 77.50   |
| Llama3.1_8B <sub>OR</sub>  | -0.1638  | 22.50 | 59.50   | 82.00   | -0.1657  | 24.00 | 61.00   | 82.00   |
| Llama3.1_70B <sub>OR</sub> | 0.0815   | 13.50 | 43.50   | 65.00   | 0.2103   | 12.50 | 54.50   | 80.00   |
| Llama3.1_8B <sub>MR</sub>  | -0.2273  | 17.50 | 55.00   | 75.00   | -0.2023  | 21.00 | 64.00   | 81.00   |
| Llama3.1_70B <sub>MR</sub> | 0.0293   | 12.50 | 45.50   | 68.50   | 0.0413   | 18.00 | 54.50   | 80.00   |
| GLM4_9B <sub>N</sub>       | -0.1057  | 5.50  | 31.00   | 54.00   | -0.0770  | 7.50  | 36.00   | 68.50   |
| GLM4_9B <sub>O</sub>       | 0.0188   | 9.50  | 36.50   | 58.50   | 0.1303   | 7.00  | 45.00   | 76.50   |

Continued on next page

Table 7 – Continued from previous page

| Model                              | Expert A |       |         |         | Expert B |       |         |         |
|------------------------------------|----------|-------|---------|---------|----------|-------|---------|---------|
|                                    | Spear    | Exact | $\pm 1$ | $\pm 2$ | Spear    | Exact | $\pm 1$ | $\pm 2$ |
| GLM4.9B <sub>OR</sub>              | 0.1711   | 13.00 | 40.50   | 71.00   | 0.2035   | 17.00 | 55.00   | 83.50   |
| GLM4.9B <sub>MR</sub>              | 0.1465   | 15.00 | 41.00   | 68.50   | 0.1517   | 15.00 | 52.00   | 79.50   |
| DeepSeek_Distill_32B <sub>N</sub>  | 0.0535   | 10.00 | 36.00   | 59.50   | 0.0986   | 10.50 | 46.00   | 76.50   |
| DeepSeek_Distill_32B <sub>O</sub>  | 0.1325   | 19.50 | 48.00   | 75.00   | -0.0159  | 17.50 | 57.50   | 83.00   |
| DeepSeek_Distill_32B <sub>OR</sub> | 0.0129   | 21.00 | 56.00   | 80.00   | 0.0402   | 24.50 | 67.00   | 90.50   |
| DeepSeek_Distill_32B <sub>MR</sub> | 0.1720   | 20.00 | 48.50   | 74.00   | 0.0432   | 26.00 | 58.00   | 86.00   |
| DeepSeek_Chat_671B <sub>MR</sub>   | 0.4918   | 40.55 | 72.05   | 89.73   | 0.2971   | 29.00 | 73.50   | 91.50   |
| DeepSeek_Reason_671B <sub>MR</sub> | 0.7640   | 58.22 | 88.90   | 98.36   | 0.3868   | 31.50 | 76.50   | 93.50   |

Table 8: Score comparison of different models and methods between Expert A

| Comparison                    | Model Size | Spearman | MAE    | RMSE   | Kendall tau | Exact | $\pm 1$ | $\pm 2$ |
|-------------------------------|------------|----------|--------|--------|-------------|-------|---------|---------|
| Qwen2.5 <sub>N</sub>          | 3B         | 0.0026   | 1.7250 | 2.0579 | 0.0025      | 15.00 | 44.00   | 75.00   |
| Qwen2.5 <sub>N</sub>          | 14B        | 0.1066   | 2.0750 | 2.3843 | 0.0939      | 8.00  | 37.00   | 60.00   |
| Qwen2.5 <sub>N</sub>          | 32B        | -0.0093  | 1.9500 | 2.2891 | -0.0089     | 12.00 | 39.50   | 64.50   |
| Qwen2.5 <sub>O</sub>          | 3B         | -0.1619  | 1.8650 | 2.2417 | -0.1423     | 14.50 | 43.00   | 68.50   |
| Qwen2.5 <sub>O</sub>          | 14B        | 0.0600   | 1.7800 | 2.1024 | 0.0488      | 13.50 | 43.00   | 71.50   |
| Qwen2.5 <sub>O</sub>          | 32B        | 0.3716   | 1.2950 | 1.6171 | 0.3309      | 25.50 | 56.00   | 89.00   |
| Qwen2.5 <sub>OR</sub>         | 3B         | 0.0278   | 1.5150 | 1.8934 | 0.0227      | 19.00 | 56.00   | 79.50   |
| Qwen2.5 <sub>OR</sub>         | 14B        | 0.1839   | 1.3900 | 1.7292 | 0.1588      | 22.00 | 56.50   | 84.00   |
| Qwen2.5 <sub>OR</sub>         | 32B        | 0.3659   | 1.1000 | 1.3565 | 0.3204      | 23.00 | 71.00   | 96.00   |
| Qwen2.5 <sub>MR</sub>         | 3B         | 0.0574   | 2.4100 | 2.8000 | 0.0486      | 8.00  | 29.00   | 57.50   |
| Qwen2.5 <sub>MR</sub>         | 14B        | 0.0106   | 1.5350 | 1.8855 | 0.0079      | 21.50 | 48.00   | 80.00   |
| Qwen2.5 <sub>MR</sub>         | 32B        | 0.2511   | 1.4650 | 1.7790 | 0.2145      | 18.00 | 54.50   | 82.50   |
| Qwen3 <sub>N</sub>            | 4B         | -0.0911  | 2.2562 | 2.6153 | -0.0800     | 8.63  | 30.82   | 59.18   |
| Qwen3 <sub>N</sub>            | 14B        | -0.1143  | 2.4800 | 2.8583 | -0.0990     | 8.00  | 28.50   | 50.00   |
| Qwen3 <sub>N</sub>            | 32B        | -0.1787  | 2.5300 | 2.8914 | -0.1570     | 6.50  | 26.00   | 51.50   |
| Qwen3 <sub>O</sub>            | 4B         | 0.0587   | 1.3918 | 1.7392 | 0.0498      | 21.51 | 58.08   | 83.42   |
| Qwen3 <sub>O</sub>            | 14B        | 0.0568   | 1.6250 | 1.9887 | 0.0483      | 17.50 | 49.50   | 77.00   |
| Qwen3 <sub>O</sub>            | 32B        | 0.1660   | 1.4450 | 1.7819 | 0.1444      | 21.50 | 52.00   | 84.50   |
| Qwen3 <sub>OR</sub>           | 4B         | 0.0728   | 1.3548 | 1.7037 | 0.0609      | 21.92 | 60.00   | 85.07   |
| Qwen3 <sub>OR</sub>           | 14B        | 0.1160   | 1.3900 | 1.7349 | 0.0977      | 24.00 | 54.50   | 83.00   |
| Qwen3 <sub>OR</sub>           | 32B        | 0.1289   | 1.3150 | 1.6628 | 0.1096      | 25.50 | 56.50   | 88.00   |
| Qwen3 <sub>MR</sub>           | 4B         | 0.1454   | 1.7849 | 2.1310 | 0.1236      | 13.01 | 44.93   | 72.60   |
| Qwen3 <sub>MR</sub>           | 14B        | 0.0059   | 1.5350 | 1.8908 | 0.0043      | 19.50 | 53.00   | 77.00   |
| Qwen3 <sub>MR</sub>           | 32B        | 0.1027   | 1.5650 | 1.9118 | 0.0876      | 18.00 | 52.00   | 77.00   |
| QWQ <sub>N</sub>              | 32B        | -0.0809  | 2.4700 | 2.8705 | -0.0702     | 9.00  | 29.50   | 51.00   |
| QWQ <sub>O</sub>              | 32B        | 0.2165   | 1.4650 | 1.8097 | 0.1839      | 20.50 | 54.00   | 81.50   |
| QWQ <sub>OR</sub>             | 32B        | 0.2307   | 1.1950 | 1.5636 | 0.1970      | 28.00 | 65.00   | 90.00   |
| QWQ <sub>MR</sub>             | 32B        | 0.7462   | 0.5507 | 1.0624 | 0.6917      | 64.52 | 86.71   | 96.03   |
| Llame3.1 <sub>N</sub>         | 8B         | -0.1488  | 2.2200 | 2.5768 | -0.1314     | 8.00  | 36.50   | 55.00   |
| Llame3.1 <sub>N</sub>         | 70B        | -0.0053  | 2.2850 | 2.6048 | -0.0045     | 7.00  | 31.50   | 53.50   |
| Llame3.1 <sub>O</sub>         | 8B         | -0.2501  | 2.0800 | 2.4454 | -0.2180     | 10.00 | 38.50   | 61.50   |
| Llame3.1 <sub>O</sub>         | 70B        | 0.1494   | 2.0050 | 2.3420 | 0.1314      | 10.50 | 38.00   | 64.50   |
| Llame3.1 <sub>OR</sub>        | 8B         | -0.1316  | 1.4600 | 1.9079 | -0.1109     | 22.50 | 59.50   | 82.00   |
| Llame3.1 <sub>OR</sub>        | 70B        | 0.0547   | 1.9200 | 2.3065 | 0.0457      | 13.50 | 43.50   | 65.00   |
| Llame3.1 <sub>MR</sub>        | 8B         | -0.2274  | 1.6700 | 2.1119 | -0.1871     | 17.50 | 55.00   | 75.00   |
| Llame3.1 <sub>MR</sub>        | 70B        | -0.0107  | 1.8700 | 2.2450 | -0.0094     | 12.50 | 45.50   | 68.50   |
| GLM4 <sub>N</sub>             | 9B         | -0.1529  | 2.3850 | 2.7322 | -0.1370     | 5.50  | 31.00   | 54.00   |
| GLM4 <sub>O</sub>             | 9B         | 0.0051   | 2.1250 | 2.4708 | 0.0035      | 9.50  | 36.50   | 58.50   |
| GLM4 <sub>OR</sub>            | 9B         | 0.1757   | 1.8450 | 2.1783 | 0.1460      | 13.00 | 40.50   | 71.00   |
| GLM4 <sub>MR</sub>            | 9B         | 0.1288   | 1.9000 | 2.2935 | 0.1072      | 15.00 | 41.00   | 68.50   |
| DeepSeekDistill <sub>N</sub>  | 32B        | 0.0136   | 2.1100 | 2.4576 | 0.0114      | 10.00 | 36.00   | 59.50   |
| DeepSeekDistill <sub>O</sub>  | 32B        | 0.1180   | 1.6650 | 2.0676 | 0.0969      | 19.50 | 48.00   | 75.00   |
| DeepSeekDistill <sub>OR</sub> | 32B        | 0.0010   | 1.4750 | 1.8507 | 0.0005      | 21.00 | 56.00   | 80.00   |
| DeepSeekDistill <sub>MR</sub> | 32B        | 0.1618   | 1.6400 | 2.0248 | 0.1329      | 20.00 | 48.50   | 74.00   |
| DeepSeekChat <sub>MR</sub>    | 671B       | 0.4777   | 1.0027 | 1.4609 | 0.4205      | 40.55 | 72.05   | 89.73   |
| DeepSeekReason <sub>MR</sub>  | 671B       | 0.7502   | 0.5452 | 0.9126 | 0.6781      | 58.22 | 88.90   | 98.36   |
| GPT-4O-mini <sub>MR</sub>     | -          | 0.0752   | 1.5800 | 1.9339 | 0.0634      | 19.00 | 49.50   | 78.00   |
| GPT-5-mini <sub>MR</sub>      | -          | 0.4159   | 1.1350 | 1.4335 | 0.3447      | 25.00 | 69.00   | 92.50   |
| GPT-5 <sub>MR</sub>           | -          | 0.2878   | 1.1700 | 1.4900 | 0.2390      | 26.50 | 64.50   | 93.00   |

Table 9: Score comparison of different models and methods between Expert B

| Comparison                    | Model Size | Spearman | MAE    | RMSE   | Kendall tau | Exact | $\pm 1$ | $\pm 2$ |
|-------------------------------|------------|----------|--------|--------|-------------|-------|---------|---------|
| Qwen2.5 <sub>N</sub>          | 3B         | 0.0736   | 1.3300 | 1.6340 | 0.0651      | 18.50 | 63.00   | 86.50   |
| Qwen2.5 <sub>N</sub>          | 14B        | 0.0458   | 1.7000 | 1.9849 | 0.0408      | 11.00 | 46.50   | 76.00   |
| Qwen2.5 <sub>N</sub>          | 32B        | 0.0947   | 1.5550 | 1.8561 | 0.0859      | 13.50 | 54.00   | 79.50   |
| Qwen2.5 <sub>O</sub>          | 3B         | -0.1422  | 1.4700 | 1.8358 | -0.1302     | 21.00 | 55.00   | 80.50   |
| Qwen2.5 <sub>O</sub>          | 14B        | 0.0666   | 1.3850 | 1.6956 | 0.0565      | 20.50 | 55.00   | 87.50   |
| Qwen2.5 <sub>O</sub>          | 32B        | 0.3676   | 0.9300 | 1.2329 | 0.3324      | 34.00 | 75.50   | 97.50   |
| Qwen2.5 <sub>OR</sub>         | 3B         | 0.0216   | 1.2700 | 1.6248 | 0.0178      | 23.00 | 64.00   | 89.50   |
| Qwen2.5 <sub>OR</sub>         | 14B        | 0.1755   | 1.0650 | 1.3657 | 0.1530      | 27.50 | 72.00   | 94.00   |
| Qwen2.5 <sub>OR</sub>         | 32B        | 0.2756   | 0.8350 | 1.1113 | 0.2442      | 35.00 | 83.00   | 98.50   |
| Qwen2.5 <sub>MR</sub>         | 3B         | 0.0607   | 2.0550 | 2.4031 | 0.0497      | 10.50 | 37.00   | 62.50   |
| Qwen2.5 <sub>MR</sub>         | 14B        | 0.0238   | 1.1400 | 1.4900 | 0.0201      | 29.00 | 68.00   | 89.00   |
| Qwen2.5 <sub>MR</sub>         | 32B        | 0.2071   | 1.1200 | 1.4318 | 0.1793      | 27.00 | 68.00   | 93.50   |
| Qwen3 <sub>N</sub>            | 4B         | -0.1385  | 2.0250 | 2.3590 | -0.1230     | 9.50  | 37.00   | 65.00   |
| Qwen3 <sub>N</sub>            | 14B        | -0.1138  | 2.1050 | 2.4525 | -0.1013     | 9.50  | 35.50   | 61.50   |
| Qwen3 <sub>N</sub>            | 32B        | -0.2137  | 2.1450 | 2.4990 | -0.1865     | 10.00 | 35.00   | 58.50   |
| Qwen3 <sub>O</sub>            | 4B         | 0.0776   | 1.1800 | 1.5000 | 0.0673      | 26.50 | 64.00   | 92.00   |
| Qwen3 <sub>O</sub>            | 14B        | 0.1821   | 1.2400 | 1.5556 | 0.1625      | 23.00 | 64.00   | 90.00   |
| Qwen3 <sub>O</sub>            | 32B        | 0.0832   | 1.2100 | 1.5166 | 0.0728      | 23.00 | 65.50   | 91.50   |
| Qwen3 <sub>OR</sub>           | 4B         | 0.0605   | 1.1150 | 1.4474 | 0.0526      | 28.00 | 68.00   | 94.50   |
| Qwen3 <sub>OR</sub>           | 14B        | 0.0681   | 1.1050 | 1.4300 | 0.0582      | 27.50 | 70.50   | 92.00   |
| Qwen3 <sub>OR</sub>           | 32B        | 0.2101   | 1.0000 | 1.3229 | 0.1822      | 32.50 | 72.50   | 95.00   |
| Qwen3 <sub>MR</sub>           | 4B         | 0.1824   | 1.5800 | 1.8735 | 0.1579      | 13.00 | 51.00   | 81.50   |
| Qwen3 <sub>MR</sub>           | 14B        | 0.1042   | 1.1500 | 1.4799 | 0.0915      | 26.00 | 68.00   | 93.00   |
| Qwen3 <sub>MR</sub>           | 32B        | 0.0708   | 1.2200 | 1.5427 | 0.0612      | 25.00 | 63.00   | 91.00   |
| QWQ <sub>N</sub>              | 32B        | -0.1022  | 2.1750 | 2.4990 | -0.0887     | 6.50  | 33.50   | 62.00   |
| QWQ <sub>O</sub>              | 32B        | 0.1772   | 1.2600 | 1.5937 | 0.1536      | 23.00 | 63.50   | 89.50   |
| QWQ <sub>OR</sub>             | 32B        | 0.2067   | 1.0700 | 1.4629 | 0.1791      | 33.50 | 70.50   | 90.50   |
| QWQ <sub>MR</sub>             | 32B        | 0.4779   | 1.0900 | 1.4832 | 0.4069      | 30.50 | 72.50   | 91.00   |
| Llame3.1 <sub>N</sub>         | 8B         | -0.0351  | 1.8650 | 2.1506 | -0.0310     | 7.50  | 42.00   | 71.50   |
| Llame3.1 <sub>N</sub>         | 70B        | -0.0075  | 1.9400 | 2.1932 | -0.0067     | 5.00  | 37.00   | 71.50   |
| Llame3.1 <sub>O</sub>         | 8B         | -0.1034  | 1.5850 | 1.9962 | -0.0895     | 20.50 | 52.00   | 77.50   |
| Llame3.1 <sub>O</sub>         | 70B        | 0.1127   | 1.6500 | 1.9468 | 0.0979      | 14.50 | 45.50   | 77.50   |
| Llame3.1 <sub>OR</sub>        | 8B         | -0.1652  | 1.3850 | 1.8014 | -0.1402     | 24.00 | 61.00   | 82.00   |
| Llame3.1 <sub>OR</sub>        | 70B        | 0.1914   | 1.5650 | 1.8722 | 0.1641      | 12.50 | 54.50   | 80.00   |
| Llame3.1 <sub>MR</sub>        | 8B         | -0.2067  | 1.3950 | 1.7958 | -0.1742     | 21.00 | 64.00   | 81.00   |
| Llame3.1 <sub>MR</sub>        | 70B        | 0.0004   | 1.5150 | 1.8615 | 0.0012      | 18.00 | 54.50   | 80.00   |
| GLM4 <sub>N</sub>             | 9B         | -0.1236  | 2.0100 | 2.3195 | -0.1112     | 7.50  | 36.00   | 68.50   |
| GLM4 <sub>O</sub>             | 9B         | 0.0769   | 1.7700 | 2.0396 | 0.0655      | 7.00  | 45.00   | 76.50   |
| GLM4 <sub>OR</sub>            | 9B         | 0.1866   | 1.4800 | 1.8028 | 0.1574      | 17.00 | 55.00   | 83.50   |
| GLM4 <sub>MR</sub>            | 9B         | 0.1219   | 1.5950 | 1.9352 | 0.1009      | 15.00 | 52.00   | 79.50   |
| DeepSeekDistill <sub>N</sub>  | 32B        | 0.0896   | 1.7350 | 2.0433 | 0.0799      | 10.50 | 46.00   | 76.50   |
| DeepSeekDistill <sub>O</sub>  | 32B        | -0.0128  | 1.4800 | 1.8385 | -0.0119     | 17.50 | 57.50   | 83.00   |
| DeepSeekDistill <sub>OR</sub> | 32B        | 0.0217   | 1.2100 | 1.5620 | 0.0174      | 24.50 | 67.00   | 90.50   |
| DeepSeekDistill <sub>MR</sub> | 32B        | 0.0452   | 1.3450 | 1.7450 | 0.0388      | 26.00 | 58.00   | 86.00   |
| DeepSeekChat <sub>MR</sub>    | 671B       | 0.2724   | 1.0700 | 1.4142 | 0.2350      | 29.00 | 73.50   | 91.50   |
| DeepSeekReason <sub>MR</sub>  | 671B       | 0.3824   | 0.9950 | 1.3360 | 0.3260      | 31.50 | 76.50   | 93.50   |
| GPT-4O-mini <sub>MR</sub>     | -          | 0.1312   | 1.2250 | 1.5508 | 0.1154      | 23.50 | 65.50   | 90.00   |
| GPT-5-mini <sub>MR</sub>      | -          | 0.3262   | 0.9800 | 1.2961 | 0.2763      | 31.00 | 76.50   | 95.00   |
| GPT-5 <sub>MR</sub>           | -          | 0.1491   | 1.0550 | 1.4089 | 0.1263      | 28.50 | 76.00   | 92.00   |

**Requirements**

请帮我判断输入文本与输出文本是否满足以下要求:

要求1.在保持原文含义不变的前提下,用原文不同的文字进行表达,不额外新增、删减会严重影响语义的内容。

要求2.在保证逻辑正确、语序通顺的前提下,变换实体、短语、概念出现的前后顺序、结构关系;顺序变换幅度越小,分数越低。

要求3.在保证特殊实体、引用、解释、特定语句不变的前提下,使用同义词替换;同义词替换越少,分数越低;

要求4.保持与原文语言风格一致,字数长度变化合理;语言风格差距越大,分数越低。

要求5.改写综合评分要非常严格,同时考虑上述4个要求;在保证语义一致(要求1)的前提下,(要求2,3)变化越大越好,字数越接近越好(要求4);如果存在大量长字段完全复制,则给0分。

评分准则,每个要求最低0分,满分均为5分,评分要尽可能严格。

Please help me determine whether the input text and output text meet the following requirements:

Requirement 1. On the premise of keeping the meaning of the original text unchanged, use different words of the original text to express, and do not add or delete additional content that will seriously affect the semantics.

Requirement 2. Change the sequence and structural relationship of entities, phrases and concepts under the premise of correct logic and smooth word order; The smaller the magnitude of the order change, the lower the score.

Requirement 3. Use synonym substitution under the premise of ensuring that special entities, references, interpretations, and specific statements remain unchanged; The fewer synonym substitutions, the lower the score;

Requirement 4. Keep consistent with the original language style, and the length of the word is reasonable; The larger the language style gap, the lower the score.

Requirement 5. Rewrite the overall score to be very strict, while considering the above 4 requirements; Under the premise of ensuring semantic consistency (requirement 1), (requirement 2,3) the greater the change, the better, and the closer the number of words, the better (requirement 4); A score of 0 is given if there exists a large number of long fields with exact duplicates.

The scoring criteria, each of which requires a minimum of 0 points and a full score of 5 points, should be as strict as possible.

**Only Prompt**

用以下格式只输出改写综合评分结果:

To output only the rewritten composite score, use the following format:

```
“json
{
  "score":
...
}
—
{data}
```

**Only-Reason Prompt**

用以下格式只输出改写综合评分结果:

To output only the rewritten composite score, use the following format:

```
“json
{
  "reason":
  "score":
...
}
—
{data}
```

**Multi-Reason Prompt**

用以下格式输出最终结果:

To output only the rewritten composite score, use the following format:

```
“json
[
  {
    "req1": "reason"
    "score":
  },
  {
    "req2": "reason"
    "score":
  },
  {
    "req3": "reason"
    "score":
  },
  {
    "req4": "reason"
    "score":
  },
  {
    "req5": "reason"
    "score":
  }
]
...
—
{data}
```

Table 10: Only, Only-Reason, Multi-Reason Prompt

---

**None Prompt**

---

请帮我评判输入文本和输出文本重写的质量，并按照以下格式输出重写评分结果，0-5分：

Please help me judge the quality of input text and output text rewriting, and output the rewriting scoring result with the following format, 0-5

points:

```
```json
{
  "score":
...
}
```

```
—
{data}
```

---

Table 11: None Prompt
